# Supplementary material for: Examining interpregnancy intervals and maternal and perinatal health outcomes using U.S. vital records: Important considerations for analysis and interpretation
Source: PubMed Central journal article supplement — Paediatr Perinat Epidemiol. 2018 Oct 15;33(1):O60–72. doi: 10.1111/ppe.12520 (PMC7379929; doi:10.1111/ppe.12520), 2018-10-15
Supplement: PPE-33-O60-s002.pdf [file PPE-33-O60-s002.pdf]

Items included on the U.S. Standard Certificate of Live Birth, by year revised

| Item                                                                                                   | 1900 | 1910 | 1915 | 1918 | 1930 | 1939 | 1949 | 1956 | 1968 | 1978 | 1989 | 2003 |
|--------------------------------------------------------------------------------------------------------|------|------|------|------|------|------|------|------|------|------|------|------|
| Birth information                                                                                      |      |      |      |      |      |      |      |      |      |      |      |      |
| Name of child                                                                                          | X    | X    | X    | X    | X    | X    | X    | X    | X    | X    | X    | X    |
| Sex                                                                                                    | X    | X    | X    | X    | X    | X    | X    | X    | X    | X    | X    | X    |
| Date of birth                                                                                          | X    | X    | X    | X    | X    | X    | X    | X    | X    | X    | X    | X    |
| Time of birth                                                                                          | X    | X    | X    | X    | X    | X    | -    | -    | -    | X    | X    | X    |
| Place of birth:                                                                                        | X    | X    | X    | X    | X    | X    | X    | X    | X    | X    | X    | X    |
| Place of delivery                                                                                      | -    | -    | -    | -    | -    | -    | X    | X    | X    | X    | X    | -    |
| Name of facility                                                                                       | -    | -    | -    | -    | -    | -    | -    | -    | -    | -    | -    | X    |
| Street and number                                                                                      | X    | X    | X    | -    | -    | -    | -    | -    | -    | -    | -    | -    |
| If birth occurred in hospital or institution, give its name instead of street number                   | -    | -    | -    | X    | X    | -    | -    | -    | -    | -    | -    | -    |
| Place where birth occurred (check one)                                                                 |      |      |      |      |      |      |      |      |      |      |      |      |
| Checkbox for "Hospital"                                                                                | -    | -    | -    | -    | -    | -    | -    | -    | -    | -    | -    | X    |
| Checkbox for "Freestanding birthing center"                                                            | -    | -    | -    | -    | -    | -    | -    | -    | -    | -    | -    | X    |
| Checkbox for "Clinic/doctor's office"                                                                  | -    | -    | -    | -    | -    | -    | -    | -    | -    | -    | -    | X    |
| Checkbox for "Residence"                                                                               | -    | -    | -    | -    | -    | -    | -    | -    | -    | -    | -    | X    |
| Checkbox for "Home birth"                                                                              | -    | -    | -    | -    | -    | -    | -    | -    | -    | -    | -    | X    |
| Planned to deliver at home? Checkbox for "yes" or "no"                                                 | -    | -    | -    | -    | -    | -    | -    | -    | -    | -    | -    | X    |
| Checkbox for "Other (specify)"                                                                         | -    | -    | -    | -    | -    | -    | -    | -    | -    | -    | -    | X    |
| Street and number if not in hospital                                                                   |      |      |      |      |      |      | X    | X    | X    | X    | X    | X    |
| Township of, or                                                                                        | X    | X    | X    | X    | X    | X    | -    | -    | -    | -    | -    | -    |
| Village of, or                                                                                         | X    | X    | X    | X    | X    | X    | -    | -    | -    | -    | -    | -    |
| City                                                                                                   | X    | X    | X    | X    | X    | X    | -    | -    | -    | -    | -    | -    |
| City, town, or location of birth                                                                       | -    | -    | -    | -    | -    | -    | X    | X    | X    | X    | X    | X    |
| Inside city limits                                                                                     | -    | -    | -    | -    | -    | -    | -    | -    | X    | X    | -    | -    |
| If outside city or town limits, write rural                                                            | -    | -    | -    | -    | -    | X    | X    | -    | -    | -    | -    | -    |
| County                                                                                                 | X    | X    | X    | X    | X    | X    | X    | X    | X    | X    | X    | X    |
| Ward                                                                                                   | X    | X    | X    | X    | X    | X    | -    | -    | -    | -    | -    | -    |
| Birth weight                                                                                           | -    | -    | -    | -    | -    | -    | -    | X    | X    | X    | X    | X    |
| Birth weight, checkbox for "grams" and "lb./oz."                                                       | -    | -    | -    | -    | -    | -    | -    | -    | -    | -    | -    | X    |
| Single, twin, triplet, etc.                                                                            | X    | X    | X    | X    | X    | X    | X    | X    | X    | X    | X    | X    |
| Plurality—Single, twin, triplet, etc. (specify)                                                        | -    | -    | -    | -    | -    | -    | -    | -    | -    | -    | -    | X    |
| Birth order if not single birth                                                                        | X    | X    | X    | X    | X    | X    | X    | X    | X    | X    | X    | X    |
| If not single birth—Born first, second, third, etc. (specify)                                          | -    | -    | -    | -    | -    | -    | -    | -    | -    | -    | -    | X    |
| Apgar Score:                                                                                           |      |      |      |      |      |      |      |      |      |      |      |      |
| 1 minute                                                                                               | -    | -    | -    | -    | -    | -    | -    | -    | -    | -    | X    | -    |
| 5 minutes                                                                                              | -    | -    | -    | -    | -    | -    | -    | -    | -    | -    | -    | X    |
| If 5-minute score is less than 6, score at 10 minutes                                                  | -    | -    | -    | -    | -    | -    | -    | -    | -    | -    | -    | X    |
| Mother transferred prior to delivery                                                                   | -    | -    | -    | -    | -    | -    | -    | -    | -    | -    | X    | X    |
| Mother transferred for maternal medical or fetal indications for delivery? Checkbox for "yes" or "no"  | -    | -    | -    | -    | -    | -    | -    | -    | -    | -    | -    | X    |
| If yes, enter name of facility mother transferred from:                                                | -    | -    | -    | -    | -    | -    | -    | -    | -    | -    | -    | X    |
| Infant transferred                                                                                     | -    | -    | -    | -    | -    | -    | -    | -    | -    | -    | X    | -    |
| Was infant transferred within 24 hours of delivery? Checkbox for "yes" or "no"                         | -    | -    | -    | -    | -    | -    | -    | -    | -    | -    | -    | X    |
| If yes, name of facility infant transferred to:                                                        | -    | -    | -    | -    | -    | -    | -    | -    | -    | -    | -    | X    |
| Is infant living at time of report? Checkbox for "yes," "no," and "infant transferred, status unknown" | -    | -    | -    | -    | -    | -    | -    | -    | -    | -    | -    | X    |
| Is the infant being breastfed at discharge? Checkbox for "yes" or "no"                                 | -    | -    | -    | -    | -    | -    | -    | -    | -    | -    | -    | X    |
| Newborn medical record number                                                                          | -    | -    | -    | -    | -    | -    | -    | -    | -    | -    | -    | X    |
| Mother information                                                                                     |      |      |      |      |      |      |      |      |      |      |      |      |
| Maiden name                                                                                            | -    | X    | X    | X    | X    | X    | X    | X    | X    | X    | -    | -    |
| Maiden surname                                                                                         | -    | -    | -    | -    | -    | -    | -    | -    | -    | -    | X    | -    |
| Full name                                                                                              | X    | -    | -    | -    | -    | -    | -    | -    | -    | -    | X    | -    |
| Mother's name prior to first marriage                                                                  | -    | -    | -    | -    | -    | -    | -    | -    | -    | -    | -    | X    |
| Mother's current legal name                                                                            | -    | -    | -    | -    | -    | -    | -    | -    | -    | -    | -    | X    |
| Age                                                                                                    | X    | X    | X    | X    | X    | X    | X    | X    | X    | X    | -    | -    |
| Date of birth                                                                                          | -    | -    | -    | -    | -    | -    | -    | -    | -    | -    | X    | X    |
| Birthplace                                                                                             | X    | X    | X    | -    | -    | -    | -    | -    | -    | -    | -    | -    |
| Birthplace (state or country)                                                                          | -    | -    | -    | X    | X    | X    | X    | X    | X    | X    | X    | X    |
| Birthplace (city or place)                                                                             | -    | -    | -    | X    | X    | X    | -    | -    | -    | -    | -    | -    |
| Mother's stay before delivery: In hospital or institution                                              |      |      |      |      |      |      |      |      |      |      |      |      |
| In this community                                                                                      | -    | -    | -    | X    | -    | -    | -    | -    | -    | -    | -    | -    |
| Residence                                                                                              | X    | X    | X    | X    | X    | -    | -    | -    | -    | -    | -    | -    |
| State                                                                                                  | -    | -    | -    | -    | -    | X    | X    | X    | X    | X    | X    | X    |
| County                                                                                                 | -    | -    | -    | X    | X    | X    | X    | X    | X    | X    | X    | X    |
| City, town, or location                                                                                | -    | -    | -    | -    | -    | X    | X    | X    | X    | X    | X    | X    |

See footnotes at end of table.

Items included on the U.S. Standard Certificate of Live Birth, by year revised—Con.

| Item                                                                                                                                                                      | 1900 | 1910 | 1915 | 1918 | 1930 | 1939 | 1949 | 1956 | 1968 | 1978 | 1989 | 2003 |
|---------------------------------------------------------------------------------------------------------------------------------------------------------------------------|------|------|------|------|------|------|------|------|------|------|------|------|
| Mother information—Con.                                                                                                                                                   |      |      |      |      |      |      |      |      |      |      |      |      |
| Street and number                                                                                                                                                         | -    | -    | -    | -    | -    | X    | X    | X    | X    | X    | X    | X    |
| Inside city limits                                                                                                                                                        | -    | -    | -    | -    | -    | -    | -    | X    | X    | X    | X    | X    |
| If rural, give location                                                                                                                                                   | -    | -    | -    | -    | -    | X    | X    | -    | -    | -    | -    | -    |
| Is residence on a farm?                                                                                                                                                   | -    | -    | -    | -    | -    | -    | -    | X    | -    | -    | -    | -    |
| Apartment No.                                                                                                                                                             | -    | -    | -    | -    | -    | -    | -    | -    | -    | -    | -    | X    |
| Mother's mailing address                                                                                                                                                  | -    | -    | -    | -    | -    | X    | -    | X    | -    | X    | X    | X    |
| Mother's mailing address—checkbox for "Same as residence" or state, city, town, or location, street and number, apartment, zip code                                       | -    | -    | -    | -    | -    | -    | -    | -    | -    | -    | -    | X    |
| Education—Specify highest grade completed                                                                                                                                 | -    | -    | -    | -    | -    | -    | -    | -    | X    | X    | X    | -    |
| Elementary (0,1,2,3,4,...or 8)                                                                                                                                            | -    | -    | -    | -    | -    | -    | -    | -    | X    | -    | -    | -    |
| Elementary/secondary (0–12)                                                                                                                                               | -    | -    | -    | -    | -    | -    | -    | -    | -    | X    | X    | -    |
| High school (1,2,3, or 4)                                                                                                                                                 | -    | -    | -    | -    | -    | -    | -    | -    | X    | -    | -    | -    |
| College (1,2,3,4, or 5+)                                                                                                                                                  | -    | -    | -    | -    | -    | -    | -    | -    | X    | -    | -    | -    |
| College (1–4 or 5+)                                                                                                                                                       | -    | -    | -    | -    | -    | -    | -    | -    | -    | X    | X    | -    |
| Education (Check the box that best describes the highest degree or level of school completed at the time of delivery):                                                    | -    | -    | -    | -    | -    | -    | -    | -    | -    | -    | -    | X    |
| Checkbox for "8th grade or less"                                                                                                                                          | -    | -    | -    | -    | -    | -    | -    | -    | -    | -    | -    | X    |
| Checkbox for "9th–12th grade, no diploma"                                                                                                                                 | -    | -    | -    | -    | -    | -    | -    | -    | -    | -    | -    | X    |
| Checkbox for "High school graduate or GED completed"                                                                                                                      | -    | -    | -    | -    | -    | -    | -    | -    | -    | -    | -    | X    |
| Checkbox for "Some college credit but no degree"                                                                                                                          | -    | -    | -    | -    | -    | -    | -    | -    | -    | -    | -    | X    |
| Checkbox for "Associate degree (e.g., AA, AS)"                                                                                                                            | -    | -    | -    | -    | -    | -    | -    | -    | -    | -    | -    | X    |
| Checkbox for "Bachelor's degree (e.g., BA, AB, BS)"                                                                                                                       | -    | -    | -    | -    | -    | -    | -    | -    | -    | -    | -    | X    |
| Checkbox for "Master's degree (e.g., MA, MS, MEng, MEd, MSW, MBA)"                                                                                                        | -    | -    | -    | -    | -    | -    | -    | -    | -    | -    | -    | X    |
| Checkbox for "Doctorate (e.g., PhD, EdD) or Professional degree (e.g., MD, DDS, DVM, LLB, JD)"                                                                            | -    | -    | -    | -    | -    | -    | -    | -    | -    | -    | -    | X    |
| Of Hispanic origin? (Specify "no" or "yes"—If yes, specify Cuban, Mexican, Puerto Rican, etc.) Checkbox for "yes" or "no" (specify)___                                    | -    | -    | -    | -    | -    | -    | -    | -    | -    | -    | X    | -    |
| Mother of Hispanic origin (Check the box that best describes whether the mother is Spanish/Hispanic/Latina. Check the "no" box if mother is not Spanish/Hispanic/Latina.) | -    | -    | -    | -    | -    | -    | -    | -    | -    | -    | -    | X    |
| Checkbox for "No, not Spanish/Hispanic/Latina"                                                                                                                            | -    | -    | -    | -    | -    | -    | -    | -    | -    | -    | -    | X    |
| Checkbox for "Yes, Mexican, Mexican American, Chicana"                                                                                                                    | -    | -    | -    | -    | -    | -    | -    | -    | -    | -    | -    | X    |
| Checkbox for "Yes, Puerto Rican"                                                                                                                                          | -    | -    | -    | -    | -    | -    | -    | -    | -    | -    | -    | X    |
| Checkbox for "Yes, Cuban"                                                                                                                                                 | -    | -    | -    | -    | -    | -    | -    | -    | -    | -    | -    | X    |
| Checkbox for "Yes, other Spanish/Hispanic/Latina (specify)"                                                                                                               | -    | -    | -    | -    | -    | -    | -    | -    | -    | -    | -    | X    |
| Race—American Indian, black, white, etc. (specify below)                                                                                                                  | X    | X    | X    | X    | X    | X    | X    | X    | X    | X    | X    | -    |
| Race (Check one or more races to indicate what the mother considers herself to be)                                                                                        |      |      |      |      |      |      |      |      |      |      |      |      |
| Checkbox for "White"                                                                                                                                                      | -    | -    | -    | -    | -    | -    | -    | -    | -    | -    | -    | X    |
| Checkbox for "Black or African American"                                                                                                                                  | -    | -    | -    | -    | -    | -    | -    | -    | -    | -    | -    | X    |
| Checkbox for "American Indian or Alaska Native (Name of the enrolled or principal tribe)"                                                                                 | -    | -    | -    | -    | -    | -    | -    | -    | -    | -    | -    | X    |
| Checkbox for "Asian Indian"                                                                                                                                               | -    | -    | -    | -    | -    | -    | -    | -    | -    | -    | -    | X    |
| Checkbox for "Chinese"                                                                                                                                                    | -    | -    | -    | -    | -    | -    | -    | -    | -    | -    | -    | X    |
| Checkbox for "Filipino"                                                                                                                                                   | -    | -    | -    | -    | -    | -    | -    | -    | -    | -    | -    | X    |
| Checkbox for "Japanese"                                                                                                                                                   | -    | -    | -    | -    | -    | -    | -    | -    | -    | -    | -    | X    |
| Checkbox for "Korean"                                                                                                                                                     | -    | -    | -    | -    | -    | -    | -    | -    | -    | -    | -    | X    |
| Checkbox for "Vietnamese"                                                                                                                                                 | -    | -    | -    | -    | -    | -    | -    | -    | -    | -    | -    | X    |
| Checkbox for "Other Asian (specify)"                                                                                                                                      | -    | -    | -    | -    | -    | -    | -    | -    | -    | -    | -    | X    |
| Checkbox for "Native Hawaiian"                                                                                                                                            | -    | -    | -    | -    | -    | -    | -    | -    | -    | -    | -    | X    |
| Checkbox for "Guamanian or Chamorro"                                                                                                                                      | -    | -    | -    | -    | -    | -    | -    | -    | -    | -    | -    | X    |
| Checkbox for "Samoan"                                                                                                                                                     | -    | -    | -    | -    | -    | -    | -    | -    | -    | -    | -    | X    |
| Checkbox for "Other Pacific Islander (specify)"                                                                                                                           | -    | -    | -    | -    | -    | -    | -    | -    | -    | -    | -    | X    |
| Checkbox for "Other (specify)"                                                                                                                                            | -    | -    | -    | -    | -    | -    | -    | -    | -    | -    | -    | X    |
| Legitimate                                                                                                                                                                | X    | X    | X    | X    | X    | -    | X    | X    | X    | -    | -    | -    |
| Mother married?                                                                                                                                                           | -    | -    | -    | -    | -    | X    | -    | -    | -    | X    | X    | -    |
| Mother married? (At birth, conception, or any time between)                                                                                                               |      |      |      |      |      |      |      |      |      |      |      |      |
| Checkbox for "yes" or "no"                                                                                                                                                | -    | -    | -    | -    | -    | -    | -    | -    | -    | -    | -    | X    |
| If no, has paternity acknowledgement been signed in the hospital? (Checkbox for "yes" or "no")                                                                            | -    | -    | -    | -    | -    | -    | -    | -    | -    | -    | -    | X    |
| Facility ID (National Provider Identifier)                                                                                                                                | -    | -    | -    | -    | -    | -    | -    | -    | -    | -    | -    | X    |
| Social security number (mother)                                                                                                                                           | -    | -    | -    | -    | -    | -    | -    | -    | -    | -    | -    | X    |
| Social security number requested for child? Checkbox for "yes" and "no"                                                                                                   | -    | -    | -    | -    | -    | -    | -    | -    | -    | -    | -    | X    |
| Occupation                                                                                                                                                                | X    | X    | X    | X    | X    | -    | -    | -    | -    | -    | -    | -    |
| Usual occupation                                                                                                                                                          | -    | -    | -    | -    | -    | X    | -    | -    | -    | -    | -    | -    |

See footnotes at end of table.

Items included on the U.S. Standard Certificate of Live Birth, by year revised—Con.

| Item                                                                                                                                                                      | 1900 | 1910 | 1915 | 1918 | 1930 | 1939 | 1949 | 1956 | 1968 | 1978 | 1989 | 2003 |
|---------------------------------------------------------------------------------------------------------------------------------------------------------------------------|------|------|------|------|------|------|------|------|------|------|------|------|
| Mother information—Con.                                                                                                                                                   |      |      |      |      |      |      |      |      |      |      |      |      |
| Nature of industry                                                                                                                                                        | -    | -    | -    | X    | X    | X    | -    | -    | -    | -    | -    | -    |
| Date (month and year) last engaged in this work                                                                                                                           | -    | -    | -    | -    | X    | -    | -    | -    | -    | -    | -    | -    |
| Total time (years) spent in this work                                                                                                                                     | -    | -    | -    | -    | X    | -    | -    | -    | -    | -    | -    | -    |
| Father information                                                                                                                                                        |      |      |      |      |      |      |      |      |      |      |      |      |
| Name                                                                                                                                                                      | X    | X    | X    | X    | X    | X    | X    | X    | X    | X    | X    | X    |
| Age                                                                                                                                                                       | X    | X    | X    | X    | X    | X    | X    | X    | X    | X    | -    | -    |
| Date of birth                                                                                                                                                             | -    | -    | -    | -    | -    | -    | -    | -    | -    | -    | X    | X    |
| Birthplace                                                                                                                                                                | X    | X    | X    | -    | -    | -    | -    | -    | -    | -    | -    | -    |
| Birthplace (state or country)                                                                                                                                             | -    | -    | -    | X    | X    | X    | X    | X    | X    | X    | X    | X    |
| Birthplace (city or place)                                                                                                                                                | -    | -    | -    | X    | X    | X    | X    | X    | X    | X    | X    | X    |
| Education—Specify highest grade completed                                                                                                                                 | -    | -    | -    | -    | -    | -    | -    | -    | X    | X    | X    | -    |
| Elementary (0,1,2,3,4,...or 8)                                                                                                                                            | -    | -    | -    | -    | -    | -    | -    | -    | X    | -    | -    | -    |
| Elementary/secondary (0–12)                                                                                                                                               | -    | -    | -    | -    | -    | -    | -    | -    | -    | X    | X    | -    |
| High school (1,2,3, or 4)                                                                                                                                                 | -    | -    | -    | -    | -    | -    | -    | -    | X    | -    | -    | -    |
| College (1,2,3,4, or 5+)                                                                                                                                                  | -    | -    | -    | -    | -    | -    | -    | -    | X    | -    | -    | -    |
| College (1–4 or 5+)                                                                                                                                                       | -    | -    | -    | -    | -    | -    | -    | -    | -    | X    | X    | -    |
| Education (Check the box that best describes the highest degree or level of school completed at the time of delivery):                                                    | -    | -    | -    | -    | -    | -    | -    | -    | -    | -    | -    | X    |
| Checkbox for “8th grade or less”                                                                                                                                          | -    | -    | -    | -    | -    | -    | -    | -    | -    | -    | -    | X    |
| Checkbox for “9th–12th grade, no diploma”                                                                                                                                 | -    | -    | -    | -    | -    | -    | -    | -    | -    | -    | -    | X    |
| Checkbox for “High school graduate or GED completed”                                                                                                                      | -    | -    | -    | -    | -    | -    | -    | -    | -    | -    | -    | X    |
| Checkbox for “Some college credit but no degree”                                                                                                                          | -    | -    | -    | -    | -    | -    | -    | -    | -    | -    | -    | X    |
| Checkbox for “Associate degree (e.g., AA, AS)”                                                                                                                            | -    | -    | -    | -    | -    | -    | -    | -    | -    | -    | -    | X    |
| Checkbox for “Bachelor’s degree (e.g., BA, AB, BS)”                                                                                                                       | -    | -    | -    | -    | -    | -    | -    | -    | -    | -    | -    | X    |
| Checkbox for “Master’s degree (e.g., MA, MS, MEng, MEd, MSW, MBA)”                                                                                                        | -    | -    | -    | -    | -    | -    | -    | -    | -    | -    | -    | X    |
| Checkbox for “Doctorate (e.g., PhD, EdD) or Professional degree (e.g., MD, DDS, DVM, LLB, JD)”                                                                            | -    | -    | -    | -    | -    | -    | -    | -    | -    | -    | -    | X    |
| Of Hispanic origin? (Specify no or yes—If yes, specify Cuban, Mexican, Puerto Rican, etc.)                                                                                | -    | -    | -    | -    | -    | -    | -    | -    | -    | -    | X    | -    |
| Checkbox for “yes” or “no” (specify)___                                                                                                                                   | -    | -    | -    | -    | -    | -    | -    | -    | -    | -    | X    | -    |
| Father of Hispanic origin (Check the box that best describes whether the father is Spanish/Hispanic/Latino. Check the “no” box if father is not Spanish/Hispanic/Latino.) | -    | -    | -    | -    | -    | -    | -    | -    | -    | -    | -    | X    |
| Checkbox for “No, not Spanish/Hispanic/Latino”                                                                                                                            | -    | -    | -    | -    | -    | -    | -    | -    | -    | -    | -    | X    |
| Checkbox for “Yes, Mexican, Mexican American, Chicano”                                                                                                                    | -    | -    | -    | -    | -    | -    | -    | -    | -    | -    | -    | X    |
| Checkbox for “Yes, Puerto Rican”                                                                                                                                          | -    | -    | -    | -    | -    | -    | -    | -    | -    | -    | -    | X    |
| Checkbox for “Yes, Cuban”                                                                                                                                                 | -    | -    | -    | -    | -    | -    | -    | -    | -    | -    | -    | X    |
| Checkbox for “Yes, other Spanish/Hispanic/Latino (specify)”                                                                                                               | -    | -    | -    | -    | -    | -    | -    | -    | -    | -    | -    | X    |
| Race                                                                                                                                                                      | X    | X    | X    | X    | X    | X    | X    | X    | X    | X    | X    | -    |
| Race (Check one or more races to indicate what the father considers himself to be)                                                                                        | -    | -    | -    | -    | -    | -    | -    | -    | -    | -    | X    | X    |
| Checkbox for “White”                                                                                                                                                      | -    | -    | -    | -    | -    | -    | -    | -    | -    | -    | -    | X    |
| Checkbox for “Black or African American”                                                                                                                                  | -    | -    | -    | -    | -    | -    | -    | -    | -    | -    | -    | X    |
| Checkbox for “American Indian or Alaska Native (Name of the enrolled or principal tribe)”                                                                                 | -    | -    | -    | -    | -    | -    | -    | -    | -    | -    | -    | X    |
| Checkbox for “Asian Indian”                                                                                                                                               | -    | -    | -    | -    | -    | -    | -    | -    | -    | -    | -    | X    |
| Checkbox for “Chinese”                                                                                                                                                    | -    | -    | -    | -    | -    | -    | -    | -    | -    | -    | -    | X    |
| Checkbox for “Filipino”                                                                                                                                                   | -    | -    | -    | -    | -    | -    | -    | -    | -    | -    | -    | X    |
| Checkbox for “Japanese”                                                                                                                                                   | -    | -    | -    | -    | -    | -    | -    | -    | -    | -    | -    | X    |
| Checkbox for “Korean”                                                                                                                                                     | -    | -    | -    | -    | -    | -    | -    | -    | -    | -    | -    | X    |
| Checkbox for “Vietnamese”                                                                                                                                                 | -    | -    | -    | -    | -    | -    | -    | -    | -    | -    | -    | X    |
| Checkbox for “Other Asian (specify)”                                                                                                                                      | -    | -    | -    | -    | -    | -    | -    | -    | -    | -    | -    | X    |
| Checkbox for “Native Hawaiian”                                                                                                                                            | -    | -    | -    | -    | -    | -    | -    | -    | -    | -    | -    | X    |
| Checkbox for “Guamanian or Chamorro”                                                                                                                                      | -    | -    | -    | -    | -    | -    | -    | -    | -    | -    | -    | X    |
| Checkbox for “Samoan”                                                                                                                                                     | -    | -    | -    | -    | -    | -    | -    | -    | -    | -    | -    | X    |
| Checkbox for “Other Pacific Islander (specify)”                                                                                                                           | -    | -    | -    | -    | -    | -    | -    | -    | -    | -    | -    | X    |
| Checkbox for “Other (specify)”                                                                                                                                            | -    | -    | -    | -    | -    | -    | -    | -    | -    | -    | -    | X    |
| Residence                                                                                                                                                                 | X    | X    | X    | X    | X    | -    | -    | -    | -    | -    | -    | -    |
| Social security number (father)                                                                                                                                           | -    | -    | -    | -    | -    | -    | -    | -    | -    | -    | -    | X    |
| Occupation                                                                                                                                                                | X    | X    | X    | X    | X    | -    | -    | -    | -    | -    | -    | -    |
| Usual occupation                                                                                                                                                          | -    | -    | -    | -    | -    | X    | X    | X    | -    | -    | -    | -    |
| Nature of industry                                                                                                                                                        | -    | -    | -    | X    | X    | X    | X    | X    | -    | -    | -    | -    |
| Date (month and year) last engaged in this work                                                                                                                           | -    | -    | -    | -    | X    | -    | -    | -    | -    | -    | -    | -    |
| Total time (years) spent in this work                                                                                                                                     | -    | -    | -    | -    | X    | -    | -    | -    | -    | -    | -    | -    |

See footnotes at end of table.

Items included on the U.S. Standard Certificate of Live Birth, by year revised—Con.

| Item                                                                                                                                                                        | 1900 | 1910 | 1915 | 1918 | 1930 | 1939 | 1949 | 1956 | 1968 | 1978 | 1989 | 2003 |
|-----------------------------------------------------------------------------------------------------------------------------------------------------------------------------|------|------|------|------|------|------|------|------|------|------|------|------|
| Medical and health information                                                                                                                                              |      |      |      |      |      |      |      |      |      |      |      |      |
| Did mother get Women, Infants, and Children (WIC) food for herself during this pregnancy? Checkbox for "yes" or "no"                                                        | -    | -    | -    | -    | -    | -    | -    | -    | -    | -    | -    | X    |
| Children born to this mother                                                                                                                                                | -    | -    | -    | -    | -    | X    | -    | -    | -    | -    | -    | -    |
| Children previously born to this mother (Do not include this child.)                                                                                                        | -    | -    | -    | -    | -    | -    | X    | -    | -    | -    | -    | -    |
| How many other children of this mother are now living?                                                                                                                      | -    | -    | -    | -    | -    | X    | X    | X    | -    | -    | -    | -    |
| How many other children were born alive but are now dead?                                                                                                                   | -    | -    | -    | -    | -    | X    | X    | X    | -    | -    | -    | -    |
| How many children were born dead?                                                                                                                                           | -    | -    | -    | -    | -    | X    | -    | -    | -    | -    | -    | -    |
| Previous deliveries to mother (Do not include this birth.)                                                                                                                  | -    | -    | -    | -    | -    | -    | -    | X    | -    | -    | -    | -    |
| Previous deliveries—How many other children...                                                                                                                              | -    | -    | -    | -    | -    | -    | -    | -    | X    | -    | -    | -    |
| Are now living                                                                                                                                                              | -    | -    | -    | -    | -    | -    | X    | X    | -    | -    | -    | -    |
| Were born alive—Now dead                                                                                                                                                    | -    | -    | -    | -    | -    | -    | X    | X    | -    | -    | -    | -    |
| Were born dead (fetal death at any time after conception)                                                                                                                   | -    | -    | -    | -    | -    | -    | -    | -    | X    | -    | -    | -    |
| How many children were stillborn (born dead after 20 weeks of pregnancy)?                                                                                                   | -    | -    | -    | -    | -    | -    | X    | -    | -    | -    | -    | -    |
| How many fetal deaths (fetuses born dead at any time after conception)?                                                                                                     | -    | -    | -    | -    | -    | -    | -    | X    | -    | -    | -    | -    |
| Pregnancy history (complete each section)                                                                                                                                   | -    | -    | -    | -    | -    | -    | -    | -    | -    | X    | X    | -    |
| Live births (Do not include this child.)                                                                                                                                    | -    | -    | -    | -    | -    | -    | -    | -    | -    | X    | X    | -    |
| Live births, Number____, checkbox for "None"                                                                                                                                | -    | -    | -    | -    | -    | -    | -    | -    | -    | -    | -    | X    |
| Live births, now dead                                                                                                                                                       | -    | -    | -    | X    | X    | X    | X    | X    | X    | X    | X    | X    |
| Born dead (stillborn, fetal death)                                                                                                                                          | -    | -    | -    | X    | X    | X    | -    | X    | X    | -    | -    | -    |
| Born dead after 20 weeks of pregnancy                                                                                                                                       | -    | -    | -    | -    | -    | -    | X    | -    | -    | -    | -    | -    |
| Other terminations (spontaneous and induced):                                                                                                                               | -    | -    | -    | -    | -    | -    | -    | -    | -    | -    | -    | -    |
| Under 20 weeks                                                                                                                                                              | -    | -    | -    | -    | -    | -    | -    | -    | -    | X    | -    | -    |
| Over 20 weeks                                                                                                                                                               | -    | -    | -    | -    | -    | -    | -    | -    | -    | X    | -    | -    |
| Other terminations (spontaneous and induced at any time after conception):                                                                                                  | -    | -    | -    | -    | -    | -    | -    | -    | -    | -    | X    | X    |
| Number of other pregnancy outcomes (spontaneous or induced losses or ectopic pregnancies)                                                                                   | -    | -    | -    | -    | -    | -    | -    | -    | -    | -    | -    | X    |
| Other outcomes—Number____, checkbox for "none"                                                                                                                              | -    | -    | -    | -    | -    | -    | -    | -    | -    | -    | -    | X    |
| Date of last other pregnancy outcome                                                                                                                                        | -    | -    | -    | -    | -    | -    | -    | -    | -    | -    | -    | X    |
| Date of last live birth                                                                                                                                                     | -    | -    | -    | -    | -    | -    | -    | -    | X    | X    | X    | X    |
| Date of last fetal death                                                                                                                                                    | -    | -    | -    | -    | -    | -    | -    | -    | X    | -    | -    | -    |
| Date of last other termination                                                                                                                                              | -    | -    | -    | -    | -    | -    | -    | -    | -    | X    | X    | X    |
| Whether born alive or stillborn                                                                                                                                             | X    | X    | X    | X    | X    | -    | -    | -    | -    | -    | -    | -    |
| Cause of stillbirth                                                                                                                                                         | -    | -    | -    | -    | X    | -    | -    | -    | -    | -    | -    | -    |
| Stillbirth—Before labor or during labor                                                                                                                                     | -    | -    | -    | -    | X    | -    | -    | -    | -    | -    | -    | -    |
| If stillborn, period of gestation                                                                                                                                           | -    | -    | -    | -    | X    | -    | -    | -    | -    | -    | -    | -    |
| Clinical estimate of gestation                                                                                                                                              | -    | -    | -    | -    | -    | -    | -    | -    | -    | -    | X    | -    |
| Obstetric estimate of gestation                                                                                                                                             | -    | -    | -    | -    | -    | -    | -    | -    | -    | -    | -    | X    |
| Date last normal menses began                                                                                                                                               | -    | -    | -    | -    | -    | -    | -    | -    | X    | X    | X    | X    |
| Mother's medical record number                                                                                                                                              | -    | -    | -    | -    | -    | -    | -    | -    | -    | -    | -    | X    |
| Length of pregnancy (completed weeks)                                                                                                                                       | -    | -    | -    | -    | -    | -    | X    | X    | -    | -    | -    | -    |
| Months of pregnancy                                                                                                                                                         | -    | -    | -    | -    | -    | X    | -    | -    | -    | -    | -    | -    |
| Premature or full term                                                                                                                                                      | -    | -    | -    | -    | X    | -    | -    | -    | -    | -    | -    | -    |
| Month of pregnancy prenatal care began                                                                                                                                      | -    | -    | -    | -    | -    | -    | -    | -    | X    | X    | X    | X    |
| Number of prenatal visits                                                                                                                                                   | -    | -    | -    | -    | -    | -    | -    | -    | X    | X    | X    | X    |
| Date of first prenatal care visit                                                                                                                                           | -    | -    | -    | -    | -    | -    | -    | -    | -    | -    | -    | X    |
| Date of last prenatal care visit                                                                                                                                            | -    | -    | -    | -    | -    | -    | -    | -    | -    | -    | -    | X    |
| Total number of prenatal visits for this pregnancy                                                                                                                          | -    | -    | -    | -    | -    | -    | -    | -    | -    | -    | -    | X    |
| Other risk factors for this pregnancy                                                                                                                                       | -    | -    | -    | -    | -    | -    | -    | -    | -    | -    | X    | -    |
| Tobacco use during pregnancy—Checkbox for "yes" or "no"                                                                                                                     | -    | -    | -    | -    | -    | -    | -    | -    | -    | -    | X    | -    |
| Average number of cigarettes per day                                                                                                                                        | -    | -    | -    | -    | -    | -    | -    | -    | -    | -    | X    | -    |
| Alcohol use during pregnancy—Checkbox for "yes" or "no"                                                                                                                     | -    | -    | -    | -    | -    | -    | -    | -    | -    | -    | X    | -    |
| Average number drinks per week                                                                                                                                              | -    | -    | -    | -    | -    | -    | -    | -    | -    | -    | X    | -    |
| Weight gained during pregnancy: ____lbs.                                                                                                                                    | -    | -    | -    | -    | -    | -    | -    | -    | -    | -    | X    | -    |
| Mother's height                                                                                                                                                             | -    | -    | -    | -    | -    | -    | -    | -    | -    | -    | -    | X    |
| Mother's prepregnancy weight                                                                                                                                                | -    | -    | -    | -    | -    | -    | -    | -    | -    | -    | -    | X    |
| Mother's weight at delivery                                                                                                                                                 | -    | -    | -    | -    | -    | -    | -    | -    | -    | -    | -    | X    |
| Cigarette smoking before and during pregnancy. For each time period, enter either the number of cigarettes or the number of packs of cigarettes smoked. If none, enter "0." | -    | -    | -    | -    | -    | -    | -    | -    | -    | -    | -    | X    |
| Average number of cigarettes or packs of cigarettes smoked per day                                                                                                          | -    | -    | -    | -    | -    | -    | -    | -    | -    | -    | -    | X    |
| Three months before pregnancy: ____# of cigarettes or ____# of packs                                                                                                        | -    | -    | -    | -    | -    | -    | -    | -    | -    | -    | -    | X    |
| First three months of pregnancy: ____# of cigarettes or ____# of packs                                                                                                      | -    | -    | -    | -    | -    | -    | -    | -    | -    | -    | -    | X    |

See footnotes at end of table.

Items included on the U.S. Standard Certificate of Live Birth, by year revised—Con.

| Item                                                                                                                                             | 1900 | 1910 | 1915 | 1918 | 1930 | 1939 | 1949 | 1956 | 1968 | 1978 | 1989 | 2003 |
|--------------------------------------------------------------------------------------------------------------------------------------------------|------|------|------|------|------|------|------|------|------|------|------|------|
| Medical and health information—Con.                                                                                                              |      |      |      |      |      |      |      |      |      |      |      |      |
| Second three months of pregnancy: ____# of cigarettes or ____# of packs                                                                          | -    | -    | -    | -    | -    | -    | -    | -    | -    | -    | -    | X    |
| Third trimester of pregnancy: ____# of cigarettes or ____# of packs                                                                              | -    | -    | -    | -    | -    | -    | -    | -    | -    | -    | -    | X    |
| Medical risk factors for this pregnancy (check all that apply)                                                                                   | -    | -    | -    | -    | -    | -    | -    | -    | -    | -    | X    | -    |
| Checkbox for "Anemia (Hct. < 30/Hgb. < 10)"                                                                                                      | -    | -    | -    | -    | -    | -    | -    | -    | -    | -    | X    | -    |
| Checkbox for "Cardiac disease"                                                                                                                   | -    | -    | -    | -    | -    | -    | -    | -    | -    | -    | X    | -    |
| Checkbox for "Acute or chronic lung disease"                                                                                                     | -    | -    | -    | -    | -    | -    | -    | -    | -    | -    | X    | -    |
| Checkbox for "Diabetes"                                                                                                                          | -    | -    | -    | -    | -    | -    | -    | -    | -    | -    | X    | -    |
| Checkbox for "Genital herpes"                                                                                                                    | -    | -    | -    | -    | -    | -    | -    | -    | -    | -    | X    | -    |
| Checkbox for "Hydramnios/oligohydramnios"                                                                                                        | -    | -    | -    | -    | -    | -    | -    | -    | -    | -    | X    | -    |
| Checkbox for "Hemoglobinopathy"                                                                                                                  | -    | -    | -    | -    | -    | -    | -    | -    | -    | -    | X    | -    |
| Checkbox for "Hypertension, chronic"                                                                                                             | -    | -    | -    | -    | -    | -    | -    | -    | -    | -    | X    | -    |
| Checkbox for "Hypertension, pregnancy-associated"                                                                                                | -    | -    | -    | -    | -    | -    | -    | -    | -    | -    | X    | -    |
| Checkbox for "Eclampsia"                                                                                                                         | -    | -    | -    | -    | -    | -    | -    | -    | -    | -    | X    | -    |
| Checkbox for "Incompetent cervix"                                                                                                                | -    | -    | -    | -    | -    | -    | -    | -    | -    | -    | X    | -    |
| Checkbox for "Previous infant 4,000+ grams"                                                                                                      | -    | -    | -    | -    | -    | -    | -    | -    | -    | -    | X    | -    |
| Checkbox for "Previous preterm or small-for-gestational age infant"                                                                              | -    | -    | -    | -    | -    | -    | -    | -    | -    | -    | X    | -    |
| Checkbox for "Renal disease"                                                                                                                     | -    | -    | -    | -    | -    | -    | -    | -    | -    | -    | X    | -    |
| Checkbox for "Rh sensitization"                                                                                                                  | -    | -    | -    | -    | -    | -    | -    | -    | -    | -    | X    | -    |
| Checkbox for "Uterine bleeding"                                                                                                                  | -    | -    | -    | -    | -    | -    | -    | -    | -    | -    | X    | -    |
| Checkbox for "None"                                                                                                                              | -    | -    | -    | -    | -    | -    | -    | -    | -    | -    | X    | -    |
| Checkbox for "Other (specify)"                                                                                                                   | -    | -    | -    | -    | -    | -    | -    | -    | -    | -    | X    | -    |
| Risk factors in this pregnancy (check all that apply)                                                                                            | -    | -    | -    | -    | -    | -    | -    | -    | -    | -    | X    | X    |
| Diabetes:                                                                                                                                        | -    | -    | -    | -    | -    | -    | -    | -    | -    | -    | X    | X    |
| Checkbox for "Prepregnancy (diagnosis prior to this pregnancy)"                                                                                  | -    | -    | -    | -    | -    | -    | -    | -    | -    | -    | X    | X    |
| Checkbox for "Gestational (diagnosis in this pregnancy)"                                                                                         | -    | -    | -    | -    | -    | -    | -    | -    | -    | -    | -    | X    |
| Hypertension:                                                                                                                                    | -    | -    | -    | -    | -    | -    | -    | -    | -    | -    | X    | X    |
| Checkbox for "Prepregnancy (chronic)"                                                                                                            | -    | -    | -    | -    | -    | -    | -    | -    | -    | -    | X    | X    |
| Checkbox for "Gestational (Pregnancy-induced hypertension, preeclampsia)"                                                                        | -    | -    | -    | -    | -    | -    | -    | -    | -    | -    | X    | X    |
| Checkbox for "Eclampsia"                                                                                                                         | -    | -    | -    | -    | -    | -    | -    | -    | -    | -    | X    | X    |
| Checkbox for "Previous preterm birth"                                                                                                            | -    | -    | -    | -    | -    | -    | -    | -    | -    | -    | X    | X    |
| Checkbox for "Other previous poor pregnancy outcome (includes perinatal death, small-for-gestational age/ intrauterine growth restricted birth)" | -    | -    | -    | -    | -    | -    | -    | -    | -    | -    | -    | X    |
| Checkbox for "Pregnancy resulted from infertility treatment— If yes, check all that apply"                                                       | -    | -    | -    | -    | -    | -    | -    | -    | -    | -    | -    | X    |
| Checkbox for "Fertility-enhancing drugs, artificial insemination, or intrauterine insemination"                                                  | -    | -    | -    | -    | -    | -    | -    | -    | -    | -    | -    | X    |
| Checkbox for "Assisted reproductive technology [e.g., in vitro fertilization (IVF), gamete intrafallopian transfer (GIFT)]"                      | -    | -    | -    | -    | -    | -    | -    | -    | -    | -    | -    | X    |
| Checkbox for "Mother had a previous cesarean delivery" If yes, how many? _____                                                                   | -    | -    | -    | -    | -    | -    | -    | -    | -    | -    | -    | X    |
| Checkbox for "None of the above"                                                                                                                 | -    | -    | -    | -    | -    | -    | -    | -    | -    | -    | -    | X    |
| Infections present and/or treated during this pregnancy (check all that apply)                                                                   | -    | -    | -    | -    | -    | -    | -    | -    | -    | -    | -    | X    |
| Checkbox for "Gonorrhea"                                                                                                                         | -    | -    | -    | -    | -    | -    | -    | -    | -    | -    | -    | X    |
| Checkbox for "Syphilis"                                                                                                                          | -    | -    | -    | -    | -    | -    | -    | -    | -    | -    | -    | X    |
| Checkbox for "Chlamydia"                                                                                                                         | -    | -    | -    | -    | -    | -    | -    | -    | -    | -    | -    | X    |
| Checkbox for "Hepatitis B"                                                                                                                       | -    | -    | -    | -    | -    | -    | -    | -    | -    | -    | -    | X    |
| Checkbox for "Hepatitis C"                                                                                                                       | -    | -    | -    | -    | -    | -    | -    | -    | -    | -    | -    | X    |
| Checkbox for "None of the above"                                                                                                                 | -    | -    | -    | -    | -    | -    | -    | -    | -    | -    | -    | X    |
| Principal source of payment for this delivery                                                                                                    | -    | -    | -    | -    | -    | -    | -    | -    | -    | -    | -    | X    |
| Checkbox for "Private Insurance"                                                                                                                 | -    | -    | -    | -    | -    | -    | -    | -    | -    | -    | -    | X    |
| Checkbox for "Medicaid"                                                                                                                          | -    | -    | -    | -    | -    | -    | -    | -    | -    | -    | -    | X    |
| Checkbox for "Self-pay"                                                                                                                          | -    | -    | -    | -    | -    | -    | -    | -    | -    | -    | -    | X    |
| Checkbox for "Other (specify) _____"                                                                                                             | -    | -    | -    | -    | -    | -    | -    | -    | -    | -    | -    | X    |
| Concurrent illnesses or conditions affecting the pregnancy                                                                                       | -    | -    | -    | -    | -    | -    | -    | -    | -    | X    | -    | -    |
| Complications not related to pregnancy                                                                                                           | -    | -    | -    | -    | -    | -    | -    | -    | X    | -    | -    | -    |
| Complications of pregnancy                                                                                                                       | -    | -    | -    | -    | -    | -    | -    | -    | -    | X    | -    | -    |
| Complications related to pregnancy                                                                                                               | -    | -    | -    | -    | -    | -    | -    | -    | X    | -    | -    | -    |
| Complications of labor                                                                                                                           | -    | -    | -    | -    | -    | -    | -    | -    | X    | -    | -    | -    |
| Complications of labor and/or delivery (check all that apply)                                                                                    | -    | -    | -    | -    | -    | -    | -    | -    | -    | -    | X    | -    |
| Checkbox for "Febrile (>100°F or 38°C)"                                                                                                          | -    | -    | -    | -    | -    | -    | -    | -    | -    | -    | X    | -    |
| Checkbox for "Meconium, moderate/heavy"                                                                                                          | -    | -    | -    | -    | -    | -    | -    | -    | -    | -    | X    | -    |
| Checkbox for "Premature rupture of membranes (>12 hours)"                                                                                        | -    | -    | -    | -    | -    | -    | -    | -    | -    | -    | X    | -    |

See footnotes at end of table.

Items included on the U.S. Standard Certificate of Live Birth, by year revised—Con.

| Item                                                                                                                                                                                  | 1900 | 1910 | 1915 | 1918 | 1930 | 1939 | 1949 | 1956 | 1968 | 1978 | 1989 | 2003 |
|---------------------------------------------------------------------------------------------------------------------------------------------------------------------------------------|------|------|------|------|------|------|------|------|------|------|------|------|
| Medical and health information—Con.                                                                                                                                                   |      |      |      |      |      |      |      |      |      |      |      |      |
| Checkbox for "Abruptio placenta"                                                                                                                                                      | -    | -    | -    | -    | -    | -    | -    | -    | -    | -    | X    | -    |
| Checkbox for "Placenta previa"                                                                                                                                                        | -    | -    | -    | -    | -    | -    | -    | -    | -    | -    | X    | -    |
| Checkbox for "Other excessive bleeding"                                                                                                                                               | -    | -    | -    | -    | -    | -    | -    | -    | -    | -    | X    | -    |
| Checkbox for "Seizures during labor"                                                                                                                                                  | -    | -    | -    | -    | -    | -    | -    | -    | -    | -    | X    | -    |
| Checkbox for "Precipitous labor (<3 hours)"                                                                                                                                           | -    | -    | -    | -    | -    | -    | -    | -    | -    | -    | X    | -    |
| Checkbox for "Prolonged labor (>20 hours)"                                                                                                                                            | -    | -    | -    | -    | -    | -    | -    | -    | -    | -    | X    | -    |
| Checkbox for "Dysfunctional labor"                                                                                                                                                    | -    | -    | -    | -    | -    | -    | -    | -    | -    | -    | X    | -    |
| Checkbox for "Breech/malpresentation"                                                                                                                                                 | -    | -    | -    | -    | -    | -    | -    | -    | -    | -    | X    | -    |
| Checkbox for "Cephalopelvic disproportion"                                                                                                                                            | -    | -    | -    | -    | -    | -    | -    | -    | -    | -    | X    | -    |
| Checkbox for "Cord prolapsed"                                                                                                                                                         | -    | -    | -    | -    | -    | -    | -    | -    | -    | -    | X    | -    |
| Checkbox for "Anesthetic complications"                                                                                                                                               | -    | -    | -    | -    | -    | -    | -    | -    | -    | -    | X    | -    |
| Checkbox for "Fetal distress"                                                                                                                                                         | -    | -    | -    | -    | -    | -    | -    | -    | -    | -    | X    | -    |
| Checkbox for "None"                                                                                                                                                                   | -    | -    | -    | -    | -    | -    | -    | -    | -    | -    | X    | -    |
| Checkbox for "Other, specify"                                                                                                                                                         | -    | -    | -    | -    | -    | -    | -    | -    | -    | -    | X    | -    |
| Onset of labor (check all that apply)                                                                                                                                                 | -    | -    | -    | -    | -    | -    | -    | -    | -    | -    | -    | X    |
| Checkbox for "Premature rupture of the membranes (prolonged, ≥12 hrs.)"                                                                                                               | -    | -    | -    | -    | -    | -    | -    | -    | -    | -    | X    | X    |
| Checkbox for "Precipitous labor (<3 hrs.)"                                                                                                                                            | -    | -    | -    | -    | -    | -    | -    | -    | -    | -    | X    | X    |
| Checkbox for "Prolonged labor (≥20 hrs.)"                                                                                                                                             | -    | -    | -    | -    | -    | -    | -    | -    | -    | -    | X    | X    |
| Checkbox for "None of the above"                                                                                                                                                      | -    | -    | -    | -    | -    | -    | -    | -    | -    | -    | X    | X    |
| Characteristics of labor and delivery (check all that apply)                                                                                                                          | -    | -    | -    | -    | -    | -    | -    | -    | -    | -    | -    | X    |
| Checkbox for "Induction of labor"                                                                                                                                                     | -    | -    | -    | -    | -    | -    | -    | -    | -    | -    | -    | X    |
| Checkbox for "Augmentation of labor"                                                                                                                                                  | -    | -    | -    | -    | -    | -    | -    | -    | -    | -    | -    | X    |
| Checkbox for "Non-vertex presentation"                                                                                                                                                | -    | -    | -    | -    | -    | -    | -    | -    | -    | -    | -    | X    |
| Checkbox for "Steroids (glucocorticoids) for fetal lung maturation received by the mother prior to delivery"                                                                          | -    | -    | -    | -    | -    | -    | -    | -    | -    | -    | -    | X    |
| Checkbox for "Antibiotics received by the mother during labor"                                                                                                                        | -    | -    | -    | -    | -    | -    | -    | -    | -    | -    | -    | X    |
| Checkbox for "Clinical chorioamnionitis diagnosed during labor or maternal temperature > 38°C (100.4°F)"                                                                              | -    | -    | -    | -    | -    | -    | -    | -    | -    | -    | -    | X    |
| Checkbox for "Moderate/heavy meconium staining of the amniotic fluid"                                                                                                                 | -    | -    | -    | -    | -    | -    | -    | -    | -    | -    | -    | X    |
| Checkbox for "Fetal intolerance of labor such that one or more of the following actions were taken: In-utero resuscitative measures, further fetal assessment, or operative delivery" | -    | -    | -    | -    | -    | -    | -    | -    | -    | -    | -    | X    |
| Checkbox for "Epidural or spinal anesthesia during labor"                                                                                                                             | -    | -    | -    | -    | -    | -    | -    | -    | -    | -    | -    | X    |
| Checkbox for "None of the above"                                                                                                                                                      | -    | -    | -    | -    | -    | -    | -    | -    | -    | -    | -    | X    |
| Obstetric procedures (check all that apply)                                                                                                                                           | -    | -    | -    | -    | -    | -    | -    | -    | -    | -    | X    | X    |
| Checkbox for "Amniocentesis"                                                                                                                                                          | -    | -    | -    | -    | -    | -    | -    | -    | -    | -    | X    | -    |
| Checkbox for "Electronic fetal monitoring"                                                                                                                                            | -    | -    | -    | -    | -    | -    | -    | -    | -    | -    | X    | -    |
| Checkbox for "Induction of labor"                                                                                                                                                     | -    | -    | -    | -    | -    | -    | -    | -    | -    | -    | X    | -    |
| Checkbox for "Stimulation of labor"                                                                                                                                                   | -    | -    | -    | -    | -    | -    | -    | -    | -    | -    | X    | -    |
| Checkbox for "Tocolysis"                                                                                                                                                              | -    | -    | -    | -    | -    | -    | -    | -    | -    | -    | X    | X    |
| Checkbox for "Ultrasound"                                                                                                                                                             | -    | -    | -    | -    | -    | -    | -    | -    | -    | -    | X    | -    |
| Checkbox for "None"                                                                                                                                                                   | -    | -    | -    | -    | -    | -    | -    | -    | -    | -    | X    | -    |
| Checkbox for "Other"                                                                                                                                                                  | -    | -    | -    | -    | -    | -    | -    | -    | -    | -    | X    | X    |
| Checkbox for "Cervical cerclage"                                                                                                                                                      | -    | -    | -    | -    | -    | -    | -    | -    | -    | -    | -    | X    |
| External cephalic version                                                                                                                                                             | -    | -    | -    | -    | -    | -    | -    | -    | -    | -    | X    | -    |
| Checkbox for "Successful"                                                                                                                                                             | -    | -    | -    | -    | -    | -    | -    | -    | -    | -    | -    | X    |
| Checkbox for "Failed"                                                                                                                                                                 | -    | -    | -    | -    | -    | -    | -    | -    | -    | -    | -    | X    |
| Checkbox for "None of the above"                                                                                                                                                      | -    | -    | -    | -    | -    | -    | -    | -    | -    | -    | -    | X    |
| Method of delivery (check all that apply)                                                                                                                                             | -    | -    | -    | -    | -    | -    | -    | -    | -    | -    | X    | -    |
| Checkbox for "Vaginal"                                                                                                                                                                | -    | -    | -    | -    | -    | -    | -    | -    | -    | -    | X    | -    |
| Checkbox for "Vaginal birth after previous C-section"                                                                                                                                 | -    | -    | -    | -    | -    | -    | -    | -    | -    | -    | X    | -    |
| Checkbox for "Primary C-section"                                                                                                                                                      | -    | -    | -    | -    | -    | -    | -    | -    | -    | -    | X    | -    |
| Checkbox for "Repeat C-section"                                                                                                                                                       | -    | -    | -    | -    | -    | -    | -    | -    | -    | -    | X    | -    |
| Checkbox for "Forceps"                                                                                                                                                                | -    | -    | -    | -    | -    | -    | -    | -    | -    | -    | X    | -    |
| Checkbox for "Vacuum"                                                                                                                                                                 | -    | -    | -    | -    | -    | -    | -    | -    | -    | -    | X    | -    |
| Method of delivery                                                                                                                                                                    | -    | -    | -    | -    | -    | -    | -    | -    | -    | -    | -    | X    |
| Was delivery with forceps attempted but unsuccessful?                                                                                                                                 | -    | -    | -    | -    | -    | -    | -    | -    | -    | -    | -    | X    |
| Checkbox for "yes" or "no"                                                                                                                                                            | -    | -    | -    | -    | -    | -    | -    | -    | -    | -    | -    | X    |
| Was delivery with vacuum extraction attempted but unsuccessful? Checkbox for "yes" or "no"                                                                                            | -    | -    | -    | -    | -    | -    | -    | -    | -    | -    | -    | X    |
| Fetal presentation at birth                                                                                                                                                           | -    | -    | -    | -    | -    | -    | -    | -    | -    | -    | -    | X    |
| Checkbox for "Cephalic"                                                                                                                                                               | -    | -    | -    | -    | -    | -    | -    | -    | -    | -    | -    | X    |
| Checkbox for "Breech"                                                                                                                                                                 | -    | -    | -    | -    | -    | -    | -    | -    | -    | -    | -    | X    |
| Checkbox for "Other"                                                                                                                                                                  | -    | -    | -    | -    | -    | -    | -    | -    | -    | -    | -    | X    |
| Final route and method of delivery (check one)                                                                                                                                        | -    | -    | -    | -    | -    | -    | -    | -    | -    | -    | -    | X    |
| Checkbox for "Vaginal/spontaneous"                                                                                                                                                    | -    | -    | -    | -    | -    | -    | -    | -    | -    | -    | -    | X    |
| Checkbox for "Vaginal/forceps"                                                                                                                                                        | -    | -    | -    | -    | -    | -    | -    | -    | -    | -    | -    | X    |

See footnotes at end of table.

Items included on the U.S. Standard Certificate of Live Birth, by year revised—Con.

| Item                                                                                                                                                           | 1900 | 1910 | 1915 | 1918 | 1930 | 1939 | 1949 | 1956 | 1968 | 1978 | 1989 | 2003 |
|----------------------------------------------------------------------------------------------------------------------------------------------------------------|------|------|------|------|------|------|------|------|------|------|------|------|
| Medical and health information—Con.                                                                                                                            |      |      |      |      |      |      |      |      |      |      |      |      |
| Checkbox for "Vaginal/vacuum"                                                                                                                                  | -    | -    | -    | -    | -    | -    | -    | -    | -    | -    | -    | X    |
| Checkbox for "Cesarean"                                                                                                                                        | -    | -    | -    | -    | -    | -    | -    | -    | -    | -    | -    | X    |
| Checkbox for "If cesarean, was a trial of labor attempted?"                                                                                                    | -    | -    | -    | -    | -    | -    | -    | -    | -    | -    | -    | -    |
| Checkbox for "yes" or "no"                                                                                                                                     | -    | -    | -    | -    | -    | -    | -    | -    | -    | -    | -    | X    |
| Maternal morbidity (check all that apply) (complications associated with labor and delivery)                                                                   | -    | -    | -    | -    | -    | -    | -    | -    | -    | -    | -    | X    |
| Checkbox for "Maternal transfusion"                                                                                                                            | -    | -    | -    | -    | -    | -    | -    | -    | -    | -    | -    | X    |
| Checkbox for "Third or fourth degree perineal laceration"                                                                                                      | -    | -    | -    | -    | -    | -    | -    | -    | -    | -    | -    | X    |
| Checkbox for "Ruptured uterus"                                                                                                                                 | -    | -    | -    | -    | -    | -    | -    | -    | -    | -    | -    | X    |
| Checkbox for "Unplanned hysterectomy"                                                                                                                          | -    | -    | -    | -    | -    | -    | -    | -    | -    | -    | -    | X    |
| Checkbox for "Admission to intensive care unit"                                                                                                                | -    | -    | -    | -    | -    | -    | -    | -    | -    | -    | -    | X    |
| Checkbox for "Unplanned operating room procedure following delivery"                                                                                           | -    | -    | -    | -    | -    | -    | -    | -    | -    | -    | -    | X    |
| Checkbox for "None of the above"                                                                                                                               | -    | -    | -    | -    | -    | -    | -    | -    | -    | -    | X    | X    |
| Abnormal conditions of the newborn (check all that apply)                                                                                                      | -    | -    | -    | -    | -    | -    | -    | -    | -    | -    | X    | X    |
| Checkbox for "Anemia (Hct. < 38/Hgb. < 13)"                                                                                                                    | -    | -    | -    | -    | -    | -    | -    | -    | -    | -    | X    | -    |
| Checkbox for "Birth injury"                                                                                                                                    | -    | -    | -    | -    | -    | -    | -    | -    | -    | -    | X    | -    |
| Checkbox for "Fetal alcohol syndrome"                                                                                                                          | -    | -    | -    | -    | -    | -    | -    | -    | -    | -    | X    | -    |
| Checkbox for "Hyaline membrane dresses/respiratory distress syndrome"                                                                                          | -    | -    | -    | -    | -    | -    | -    | -    | -    | -    | X    | -    |
| Checkbox for "Meconium aspiration syndrome"                                                                                                                    | -    | -    | -    | -    | -    | -    | -    | -    | -    | -    | X    | -    |
| Checkbox for "Assisted ventilation ≤ 30 min"                                                                                                                   | -    | -    | -    | -    | -    | -    | -    | -    | -    | -    | X    | -    |
| Checkbox for "Assisted ventilation ≥ 30 min"                                                                                                                   | -    | -    | -    | -    | -    | -    | -    | -    | -    | -    | X    | -    |
| Checkbox for "Seizures"                                                                                                                                        | -    | -    | -    | -    | -    | -    | -    | -    | -    | -    | X    | -    |
| Checkbox for "None"                                                                                                                                            | -    | -    | -    | -    | -    | -    | -    | -    | -    | -    | X    | -    |
| Checkbox for "Other (specify)"                                                                                                                                 | -    | -    | -    | -    | -    | -    | -    | -    | -    | -    | X    | -    |
| Checkbox for "Assisted ventilation required immediately following delivery"                                                                                    | -    | -    | -    | -    | -    | -    | -    | -    | -    | -    | -    | X    |
| Checkbox for "Assisted ventilation required for more than six hours"                                                                                           | -    | -    | -    | -    | -    | -    | -    | -    | -    | -    | -    | X    |
| Checkbox for "NICU admission"                                                                                                                                  | -    | -    | -    | -    | -    | -    | -    | -    | -    | -    | -    | X    |
| Checkbox for "Newborn given surfactant replacement therapy"                                                                                                    | -    | -    | -    | -    | -    | -    | -    | -    | -    | -    | -    | X    |
| Checkbox for "Antibiotics received by the newborn for suspected neonatal sepsis"                                                                               | -    | -    | -    | -    | -    | -    | -    | -    | -    | -    | -    | X    |
| Checkbox for "Seizure or serious neurologic dysfunction"                                                                                                       | -    | -    | -    | -    | -    | -    | -    | -    | -    | -    | -    | X    |
| Checkbox for "Significant birth injury (skeletal fracture(s), peripheral nerve injury, and/or soft tissue/solid organ hemorrhage which requires intervention)" | -    | -    | -    | -    | -    | -    | -    | -    | -    | -    | -    | X    |
| Checkbox for "None of the above"                                                                                                                               | -    | -    | -    | -    | -    | -    | -    | -    | -    | -    | X    | X    |
| Congenital malformations or anomalies of child                                                                                                                 | -    | -    | -    | -    | -    | -    | -    | -    | X    | X    | -    | -    |
| Congenital anomalies of child (check all that apply)                                                                                                           | -    | -    | -    | -    | -    | -    | -    | -    | -    | -    | X    | X    |
| Checkbox for "Hydrocephalus"                                                                                                                                   | -    | -    | -    | -    | -    | -    | -    | -    | -    | -    | X    | -    |
| Checkbox for "Microcephalus"                                                                                                                                   | -    | -    | -    | -    | -    | -    | -    | -    | -    | -    | X    | -    |
| Checkbox for "Other central nervous system anomalies (specify)"                                                                                                | -    | -    | -    | -    | -    | -    | -    | -    | -    | -    | X    | -    |
| Checkbox for "Heart malformations"                                                                                                                             | -    | -    | -    | -    | -    | -    | -    | -    | -    | -    | X    | -    |
| Checkbox for "Other circulatory/respiratory anomalies (specify)"                                                                                               | -    | -    | -    | -    | -    | -    | -    | -    | -    | -    | X    | -    |
| Checkbox for "Rectal atresia/stenosis"                                                                                                                         | -    | -    | -    | -    | -    | -    | -    | -    | -    | -    | X    | -    |
| Checkbox for "Tracheo-esophageal fistula/esophageal atresia"                                                                                                   | -    | -    | -    | -    | -    | -    | -    | -    | -    | -    | X    | -    |
| Checkbox for "Other gastrointestinal anomalies (specify)"                                                                                                      | -    | -    | -    | -    | -    | -    | -    | -    | -    | -    | X    | -    |
| Checkbox for "Malformed genitalia"                                                                                                                             | -    | -    | -    | -    | -    | -    | -    | -    | -    | -    | X    | -    |
| Checkbox for "Renal agenesis"                                                                                                                                  | -    | -    | -    | -    | -    | -    | -    | -    | -    | -    | X    | -    |
| Checkbox for "Other urogenital anomalies (specify)"                                                                                                            | -    | -    | -    | -    | -    | -    | -    | -    | -    | -    | X    | -    |
| Checkbox for "Cleft lip/palate"                                                                                                                                | -    | -    | -    | -    | -    | -    | -    | -    | -    | -    | X    | -    |
| Checkbox for "Polydactyly/syndactyly/adactyly"                                                                                                                 | -    | -    | -    | -    | -    | -    | -    | -    | -    | -    | X    | -    |
| Checkbox for "Club foot"                                                                                                                                       | -    | -    | -    | -    | -    | -    | -    | -    | -    | -    | X    | -    |
| Checkbox for "Other musculoskeletal/integumental anomalies (specify)"                                                                                          | -    | -    | -    | -    | -    | -    | -    | -    | -    | -    | X    | -    |
| Checkbox for "Other chromosomal anomalies (specify)"                                                                                                           | -    | -    | -    | -    | -    | -    | -    | -    | -    | -    | X    | -    |
| Checkbox for "None"                                                                                                                                            | -    | -    | -    | -    | -    | -    | -    | -    | -    | -    | X    | -    |
| Checkbox for "Other (specify)"                                                                                                                                 | -    | -    | -    | -    | -    | -    | -    | -    | -    | -    | X    | -    |
| Checkbox for "Anencephaly"                                                                                                                                     | -    | -    | -    | -    | -    | -    | -    | -    | -    | -    | X    | X    |
| Checkbox for "Meningomyelocele/spina bifida"                                                                                                                   | -    | -    | -    | -    | -    | -    | -    | -    | -    | -    | X    | X    |
| Checkbox for "Cyanotic congenital heart disease"                                                                                                               | -    | -    | -    | -    | -    | -    | -    | -    | -    | -    | -    | X    |
| Checkbox for "Congenital diaphragmatic hernia"                                                                                                                 | -    | -    | -    | -    | -    | -    | -    | -    | -    | -    | X    | X    |
| Checkbox for "Omphalocele"                                                                                                                                     | -    | -    | -    | -    | -    | -    | -    | -    | -    | -    | X    | X    |
| Checkbox for "Gastroschisis"                                                                                                                                   | -    | -    | -    | -    | -    | -    | -    | -    | -    | -    | X    | X    |
| Checkbox for "Limb reduction defect (excluding congenital amputation and dwarfing syndromes)"                                                                  | -    | -    | -    | -    | -    | -    | -    | -    | -    | -    | -    | X    |

See footnotes at end of table.

Items included on the U.S. Standard Certificate of Live Birth, by year revised—Con.

| Item                                                                                                          | 1900 | 1910 | 1915 | 1918 | 1930 | 1939 | 1949 | 1956 | 1968 | 1978 | 1989 | 2003 |
|---------------------------------------------------------------------------------------------------------------|------|------|------|------|------|------|------|------|------|------|------|------|
| Medical and health information—Con.                                                                           |      |      |      |      |      |      |      |      |      |      |      |      |
| Checkbox for "Cleft lip with or without cleft palate"                                                         | -    | -    | -    | -    | -    | -    | -    | -    | -    | -    | X    | X    |
| Checkbox for "Cleft palate alone"                                                                             | -    | -    | -    | -    | -    | -    | -    | -    | -    | -    | -    | X    |
| Checkbox for "Down syndrome"                                                                                  | -    | -    | -    | -    | -    | -    | -    | -    | -    | -    | X    | X    |
| Checkbox for "Karyotype confirmed"                                                                            | -    | -    | -    | -    | -    | -    | -    | -    | -    | -    | -    | X    |
| Checkbox for "Karyotype pending"                                                                              | -    | -    | -    | -    | -    | -    | -    | -    | -    | -    | -    | X    |
| Checkbox for "Suspected chromosomal disorder"                                                                 | -    | -    | -    | -    | -    | -    | -    | -    | -    | -    | -    | X    |
| Checkbox for "Karyotype confirmed"                                                                            | -    | -    | -    | -    | -    | -    | -    | -    | -    | -    | -    | X    |
| Checkbox for "Karyotype pending"                                                                              | -    | -    | -    | -    | -    | -    | -    | -    | -    | -    | -    | X    |
| Checkbox for "Hypospadias"                                                                                    | -    | -    | -    | -    | -    | -    | -    | -    | -    | -    | -    | X    |
| Checkbox for "None of the anomalies listed above"                                                             | -    | -    | -    | -    | -    | -    | -    | -    | -    | -    | X    | X    |
| Birth injuries to child                                                                                       | -    | -    | -    | -    | -    | -    | -    | -    | X    | -    | -    | -    |
| Certification information                                                                                     |      |      |      |      |      |      |      |      |      |      |      |      |
| Signature of certifier                                                                                        | -    | -    | -    | -    | -    | -    | -    | -    | -    | -    | X    | X    |
| Type of attendant                                                                                             | -    | -    | -    | -    | -    | -    | -    | -    | -    | -    | X    | X    |
| Date signed                                                                                                   | -    | -    | -    | -    | -    | -    | -    | -    | -    | -    | X    | X    |
| Date on which given name was added                                                                            | X    | X    | X    | X    | X    | X    | X    | X    | -    | -    | -    | -    |
| Certificate of attending physician or midwife                                                                 | -    | -    | -    | -    | -    | -    | -    | -    | -    | -    | -    | -    |
| I hereby certify that I attended the birth of this child, and that it occurred on____, 190_, at ___m.         | -    | -    | -    | -    | -    | -    | -    | -    | -    | -    | -    | -    |
| When there was no attending physician or midwife, then the father, householder, etc., should make this return | X    | X    | -    | -    | -    | -    | -    | -    | -    | -    | -    | -    |
| Signature                                                                                                     | X    | X    | -    | -    | -    | -    | -    | -    | -    | -    | -    | -    |
| Address                                                                                                       | X    | X    | -    | -    | -    | -    | -    | -    | -    | -    | -    | -    |
| Filed___190_,                                                                                                 | X    | X    | -    | -    | -    | -    | -    | -    | -    | -    | -    | -    |
| Registrar                                                                                                     | X    | X    | -    | -    | -    | -    | -    | -    | -    | -    | -    | -    |
| Christian name added from supplemental report, 190_                                                           | X    | -    | -    | -    | -    | -    | -    | -    | -    | -    | -    | -    |
| Given name added from supplemental report, (date of)_                                                         | X    | X    | X    | X    | X    | -    | -    | -    | -    | -    | -    | -    |
| Name of registrar adding given name                                                                           | X    | X    | X    | X    | X    | X    | X    | X    | -    | -    | -    | -    |
| Name and title of attendant at birth if other than certifier                                                  | -    | -    | -    | -    | -    | -    | -    | -    | -    | X    | -    | -    |
| Name and title of attendant if other than certifier (checkboxes)                                              | -    | -    | -    | -    | -    | -    | -    | -    | -    | -    | X    | X    |
| Mailing address of attendant                                                                                  | -    | -    | -    | -    | -    | -    | -    | -    | -    | -    | X    | X    |
| Name and title of certifier                                                                                   | -    | -    | -    | -    | -    | -    | -    | -    | -    | X    | -    | -    |
| Name and title of certifier (checkboxes)                                                                      | -    | -    | -    | -    | -    | -    | -    | -    | -    | -    | X    | X    |
| Name of certifier                                                                                             | -    | -    | -    | -    | -    | -    | -    | -    | X    | -    | -    | -    |
| Mailing address of certifier                                                                                  | -    | -    | -    | -    | -    | -    | -    | -    | X    | X    | -    | -    |
| Address of certifier                                                                                          | X    | X    | X    | X    | X    | X    | X    | X    | -    | -    | -    | -    |
| Signature of registrar                                                                                        | X    | -    | -    | -    | -    | X    | X    | X    | X    | X    | X    | X    |
| Registrar                                                                                                     | X    | X    | X    | X    | X    | -    | -    | -    | -    | -    | -    | -    |
| Date received by registrar                                                                                    | X    | -    | -    | -    | -    | -    | -    | -    | -    | X    | -    | -    |
| Date received by local registrar                                                                              | X    | -    | -    | -    | -    | X    | X    | X    | X    | -    | -    | -    |
| Date filed                                                                                                    | X    | X    | X    | X    | X    | -    | -    | -    | -    | -    | X    | X    |
| Signature of parent or other informant                                                                        | -    | -    | -    | -    | -    | -    | -    | -    | -    | X    | X    | -    |
| Informant                                                                                                     | -    | -    | -    | -    | -    | X    | X    | X    | X    | -    | -    | -    |
| Relation to child                                                                                             | -    | -    | -    | -    | -    | X    | -    | -    | X    | X    | -    | -    |
| Information for Administrative Use Section                                                                    | -    | -    | -    | -    | -    | -    | -    | -    | -    | -    | -    | X    |
| Information for Medical and Health Purposes Only Section                                                      | -    | -    | -    | -    | -    | -    | -    | -    | -    | -    | -    | X    |
| Newborn Information Section                                                                                   | -    | -    | -    | -    | -    | -    | -    | -    | -    | -    | -    | X    |

X Indicates item included on standard certificate.

- Indicates item not included on standard certificate.
