# Supplementary material for: Examining interpregnancy intervals and maternal and perinatal health outcomes using U.S. vital records: Important considerations for analysis and interpretation
Source: PubMed Central journal article supplement — Paediatr Perinat Epidemiol. 2018 Oct 15;33(1):O60–72. doi: 10.1111/ppe.12520 (PMC7379929; doi:10.1111/ppe.12520), 2018-10-15
Supplement: PPE-33-O60-s003.pdf [file PPE-33-O60-s003.pdf]

**Comparability of selected data items from the 2003 U.S. Standard Certificate of Live Birth with items from the 1989 U.S. Standard Certificate of Live Birth**

| <i>Item on 2003 U.S. Standard Certificate of Live Birth</i>       | <i>Comparable</i> | <i>Not comparable</i> | <i>New</i> |
|-------------------------------------------------------------------|-------------------|-----------------------|------------|
| Race - Mother/Father                                              | X <sup>1</sup>    |                       |            |
| Hispanic origin - Mother/Father                                   | X                 |                       |            |
| Education - Mother/Father                                         |                   | X                     |            |
| Cigarette smoking during pregnancy                                |                   | X                     |            |
| Month prenatal care began                                         |                   | X                     |            |
| <b>Risk factors in this pregnancy</b>                             |                   |                       |            |
| Diabetes, Prepregnancy (Diagnosis prior to this pregnancy)        | X <sup>2</sup>    |                       |            |
| Diabetes, Gestational (Diagnosis in this pregnancy)               | X <sup>2</sup>    |                       |            |
| Hypertension, Prepregnancy (chronic)                              | X                 |                       |            |
| Hypertension, Gestational (PIH, preeclampsia)                     | X                 |                       |            |
| Hypertension, Eclampsia                                           | X                 |                       |            |
| Previous preterm birth                                            |                   | X                     |            |
| Other previous poor pregnancy outcome                             |                   | X                     |            |
| Mother had previous cesarean delivery                             |                   | X                     |            |
| <b>Obstetric Procedures</b>                                       |                   |                       |            |
| Cervical cerclage                                                 |                   | X                     |            |
| Tocolysis                                                         | X                 |                       |            |
| External cephalic version - Successful                            |                   |                       | X          |
| External cephalic version - Failed                                |                   |                       | X          |
| <b>Onset of Labor</b>                                             |                   |                       |            |
| Premature rupture >=12 hrs                                        |                   | X                     |            |
| Precipitous labor <3 hrs                                          | X                 |                       |            |
| Prolonged labor >=20 hours                                        |                   | X                     |            |
| <b>Characteristics of Labor/Delivery</b>                          |                   |                       |            |
| Induction of labor                                                | X                 |                       |            |
| Augmentation of labor                                             |                   | X                     |            |
| Non-vertex presentation                                           |                   |                       | X          |
| Steroids (glucocorticoids) for fetal lung maturation              |                   |                       | X          |
| Antibiotics received by the mother during labor                   |                   |                       | X          |
| Clinical chorioamnionitis diagnosed during labor                  |                   | X                     |            |
| Moderate/heavy meconium staining of the amniotic fluid            | X                 |                       |            |
| Fetal intolerance of labor                                        |                   | X                     |            |
| Epidural or spinal anesthesia during labor                        |                   |                       | X          |
| <b>Method of Delivery</b>                                         |                   |                       |            |
| Forceps delivery attempted but unsuccessful?                      |                   | X                     |            |
| Vacuum extraction delivery attempted but unsuccessful?            |                   | X                     |            |
| Cephalic Presentation                                             |                   |                       | X          |
| Breech Presentation                                               | X <sup>3</sup>    |                       |            |
| Other presentation                                                | X <sup>3</sup>    |                       |            |
| Final route and method of delivery Vaginal/Spontaneous            | X <sup>4</sup>    |                       |            |
| Final route and method of delivery Vaginal/Forceps                | X <sup>4</sup>    |                       |            |
| Final route and method of delivery Vaginal/Vacuum                 | X <sup>4</sup>    |                       |            |
| Final route and method of delivery Cesarean                       | X <sup>5</sup>    |                       |            |
| If cesarean, was trial of labor attempted?                        |                   |                       | X          |
| <b>NEWBORN INFORMATION</b>                                        |                   |                       |            |
| Birthweight                                                       | X                 |                       |            |
| Apgar Score - 5 minute                                            | X                 |                       |            |
| Plurality                                                         | X                 |                       |            |
| <b>Abnormal Conditions of the Newborn</b>                         |                   |                       |            |
| Assisted ventilation required immediately following delivery      |                   | X                     |            |
| Assisted ventilation > 6 hours                                    |                   | X                     |            |
| NICU admission                                                    |                   |                       | X          |
| Newborn given surfactant replacement therapy                      |                   |                       | X          |
| Antibiotics received by the newborn for suspected neonatal sepsis |                   |                       | X          |
| Seizure or serious neurologic dysfunction                         |                   | X                     |            |
| Significant birth injury                                          |                   | X                     |            |
| <b>Congenital Anomalies</b>                                       |                   |                       |            |
| Anencephaly                                                       | X                 |                       |            |
| Meningomyelocele/Spina Bifida                                     | X                 |                       |            |
| Cyanotic congenital heart disease                                 |                   |                       | X          |
| Congenital diaphragmatic hernia                                   | X                 |                       |            |
| Omphalocele                                                       | X <sup>6</sup>    |                       |            |
| Gastroschisis                                                     | X <sup>6</sup>    |                       |            |
| Limb reduction defect                                             |                   |                       | X          |
| Cleft lip with or without Cleft palate                            | X <sup>7</sup>    |                       |            |
| Cleft Palate alone                                                | X <sup>7</sup>    |                       |            |

|                                                      |   |   |   |
|------------------------------------------------------|---|---|---|
| Down Syndrome                                        | X |   |   |
| Down Syndrome - karyotype confirmed                  |   |   | X |
| Down Syndrome - karyotype pending                    |   |   | X |
| Suspected chromosomal disorder                       |   | X |   |
| Suspected chromosomal disorder - karyotype confirmed |   |   | X |
| Suspected chromosomal disorder - karyotype pending   |   |   | X |
| Hypospadias                                          |   |   | X |

<sup>1</sup> Twenty-seven states reported multiple race data in 2007. The multiple-race data for these states are bridged to the single race categories of the 1977 OMB standards for comparability with other states; See Detailed Technical Notes.

<sup>2</sup> Prepregnancy diabetes and Gestational diabetes may be combined to be consistent with the Diabetes item reported on the 1989 U.S. Standard Certificate of Live Birth.

<sup>3</sup> "Breech" and "Other" fetal presentations at birth may be combined to be consistent with the Breech/malpresentation item on the 1989 U.S. Standard Certificate of Live Birth.

<sup>4</sup> Information on whether the vaginal delivery following a previous cesarean delivery (VBAC) is not comparable.

<sup>5</sup> Information on whether the delivery was a primary or repeat cesarean is not comparable.

<sup>6</sup> "Omphalocele" and "Gastroschisis" may be combined to be consistent with the Omphalocele/Gastroschisis item on the 1989 U.S. Standard Certificate of Live Birth.

<sup>7</sup> Cleft lip with or without palate may be combined with Cleft lip alone to be consistent with the Cleft lip/palate item on the 1989 U.S. Standard Certificate of Live Birth.
